# Supplementary material
Source: MDPI journal article supplement (https://www.mdpi.com/2079-6412/7/1/8)

# Supplementary Materials: Assessment of Environmental Performance of TiO<sub>2</sub> Nanoparticles Coated Self-Cleaning Float Glass

Martina Pini <sup>1,\*</sup>, Erika Iveth Cedillo González <sup>2,3</sup>, Paolo Neri <sup>1</sup>, Cristina Siligardi <sup>2</sup> and Anna Maria Ferrari <sup>1</sup>

<sup>1</sup> Department of Sciences and Engineering Methods, University of Modena and Reggio Emilia, Via Amendola, 2, 42100 Reggio Emilia, Italy; paolo.neri@unimore.it (P.N.); annamaria.ferrari@unimore.it (A.M.F.)

<sup>2</sup> Department of Engineering “Enzo Ferrari”, University of Modena and Reggio Emilia, Via Vignolese, 905/A, 41125 Modena, Italy; erikaiveth.cedillogonzalez@unimore.it (E.I.C.G.); cristina.siligardi@unimore.it (C.S.)

<sup>3</sup> Facultad de Ciencias Químicas, Universidad Autónoma de Nuevo León, Guerrero y Progreso s/n Col. Treviño, Monterrey 64570, Mexico

\* Correspondence: martina.pini@unimore.it; Tel.: +39-052-252-2089

## S1. Uncoated Float Glass

The modeling of uncoated float glass considers the following criteria:

- “Flat glass, uncoated, at plant/RER” Ecoinvent v2 process was used to represent the glass manufacturing process.
- Cutting and lapping were taken into consideration.
- Installation of uncoated glass as windows to a private building, but contrary to nanoTiO<sub>2</sub> functionalized float glass no precautionary behaviors, such as special packaging and PPE, needed to be consider.
- Transportation by lorry from the company, where the uncoated glass was manufactured, to the installation site and the handling of glasses from lorry to private building was assessed.
- The phenomenon of radiation heat is the same as previously described for nanocoated glass, but in this case the sunlight radiation that passes through the uncoated glass is greater than on the nanocoated glass one, since the solar factor of uncoated glass (0.76) is greater than the nanocoated glass one (0.47). The solar factor is a parameter, which indicates the ability of a transparent material to let solar radiation through. It represents the fraction of solar energy that enters the environment, compared to the total incident.
- The cleaning of glass every four weeks using water and detergent has been assumed.
- The glass recycling process as end of life treatment has been adopted.

**Table S1.** LCIA comparison of 1 m<sup>2</sup> among uncoated flat glass (conventional material) and nanoTiO<sub>2</sub> functionalized coated float glasses (innovative materials).

| Impact Category        | Unit                                   | Total     | A                                          | B                                                                 | C                                                                                         |
|------------------------|----------------------------------------|-----------|--------------------------------------------|-------------------------------------------------------------------|-------------------------------------------------------------------------------------------|
|                        |                                        |           | Uncoated Flat Glass<br>(30 Years Lifetime) | NanoTiO <sub>2</sub> Coated<br>Float Glass<br>(10 Years Lifetime) | NanoTiO <sub>2</sub> Coated<br>Float Glass<br>(30 Years Lifetime)<br>re-Functionalization |
| Carcinogens            | kg C <sub>2</sub> H <sub>3</sub> Cl eq | 7.36      | 1.73                                       | 2.98                                                              | 2.64                                                                                      |
| Non-carcinogens        | kg C <sub>2</sub> H <sub>3</sub> Cl eq | 4.23      | 5.53E-01                                   | 2.13                                                              | 1.55                                                                                      |
| Respiratory inorganics | kg PM <sub>2.5</sub> eq                | 2.55E-01  | 6.61E-02                                   | 1.24E-01                                                          | 6.56E-02                                                                                  |
| Ionizing radiation     | Bq C-14 eq                             | 7.42E+03  | 1.55E+03                                   | 3.23E+03                                                          | 2.64E+03                                                                                  |
| Ozone layer depletion  | kg CFC-11 eq                           | 1.07E-04  | 2.50E-05                                   | 4.30E-05                                                          | 3.92E-05                                                                                  |
| Respiratory organics   | kg C <sub>2</sub> H <sub>4</sub> eq    | -1.10E+01 | 4.54E-02                                   | -5.49E+00                                                         | -5.51                                                                                     |

Table S1. Cont.

| Impact Category         | Unit                      | Total    | A<br>Uncoated Flat Glass<br>(30 Years Lifetime) | B<br>NanoTiO <sub>2</sub> Coated<br>Float Glass<br>(10 Years Lifetime) | C<br>NanoTiO <sub>2</sub> Coated<br>Float Glass<br>(30 Years Lifetime)<br>re-Functionalization |
|-------------------------|---------------------------|----------|-------------------------------------------------|------------------------------------------------------------------------|------------------------------------------------------------------------------------------------|
| Aquatic ecotoxicity     | kg TEG water              | 4.05E+04 | 3.55E+03                                        | 1.99E+04                                                               | 1.71E+04                                                                                       |
| Terrestrial ecotoxicity | kg TEG soil               | 4.35E+03 | 3.09E+02                                        | 2.32E+03                                                               | 1.72E+03                                                                                       |
| Terrestrial acid/nutri  | kg SO <sub>2</sub> eq     | 2.97     | 1.73                                            | 1.12                                                                   | 1.18E-01                                                                                       |
| Land occupation         | m <sup>2</sup> org.arable | 3.31E+01 | 1.84E+01                                        | 9.81E+00                                                               | 4.89                                                                                           |
| Aquatic acidification   | kg SO <sub>2</sub> eq     | 2.07     | 3.81E-01                                        | 9.82E-01                                                               | 7.06E-01                                                                                       |
| Aquatic eutrophication  | kg PO <sub>4</sub> P-lim  | 8.19E-02 | 3.33E-02                                        | 2.73E-02                                                               | 2.12E-02                                                                                       |
| Global warming          | kg CO <sub>2</sub> eq     | 6.34E+02 | 1.67E+02                                        | 2.56E+02                                                               | 2.12E+02                                                                                       |
| Non-renewable energy    | MJ primary                | 1.12E+04 | 3.10E+03                                        | 4.36E+03                                                               | 3.72E+03                                                                                       |
| Mineral extraction      | MJ surplus                | 1.87E+01 | 2.02                                            | 9.36                                                                   | 7.28                                                                                           |
| Radioactive waste       | kg                        | 9.80E-03 | 2.13E-03                                        | 4.23E-03                                                               | 3.45E-03                                                                                       |
| Carcinogens inhaled     | kg                        | 3.45E-06 | -                                               | 2.24E-06                                                               | 1.21E-06                                                                                       |

**S2. Environmental Assessment by Single Score of NanoTiO<sub>2</sub> Functionalized Float Glasses and the Conventional Ones**

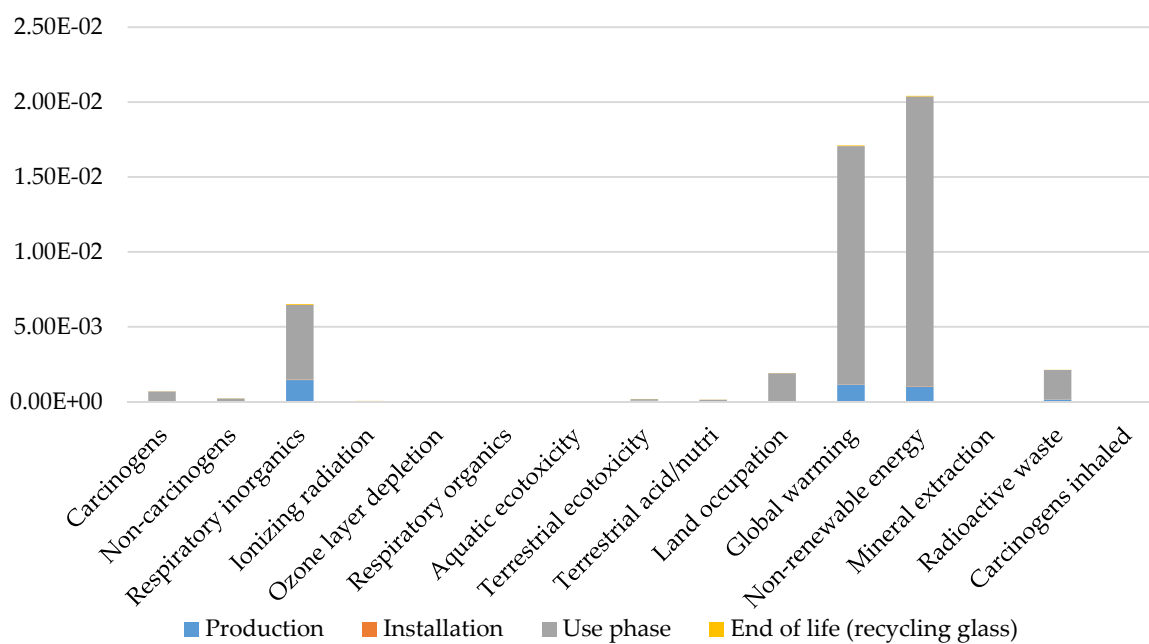

Figure S1. Evaluation by impact categories of 1 m<sup>2</sup> of uncoated flat glass (30 years life time).

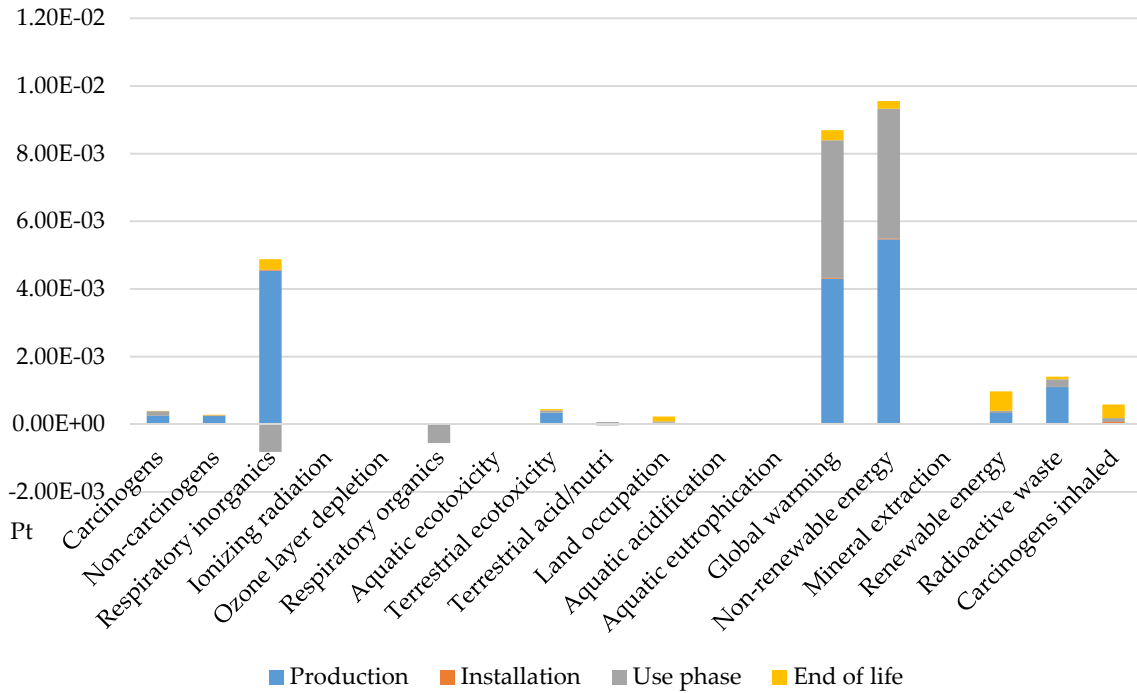

**Figure S2.** Evaluation by impact categories of 1 m<sup>2</sup> of nanoTiO<sub>2</sub> self-cleaning coated float glass (10 years life time).

The environmental analysis of 1 m<sup>2</sup> of nanoTiO<sub>2</sub> self-cleaning coated float glass (30 years life time) re-functionalized twice has been carried out considering 1 m<sup>2</sup> of nanoTiO<sub>2</sub> self-cleaning coated float glass (10 years life time) and the same process without end of life of glass and considering two functionalization treatments).

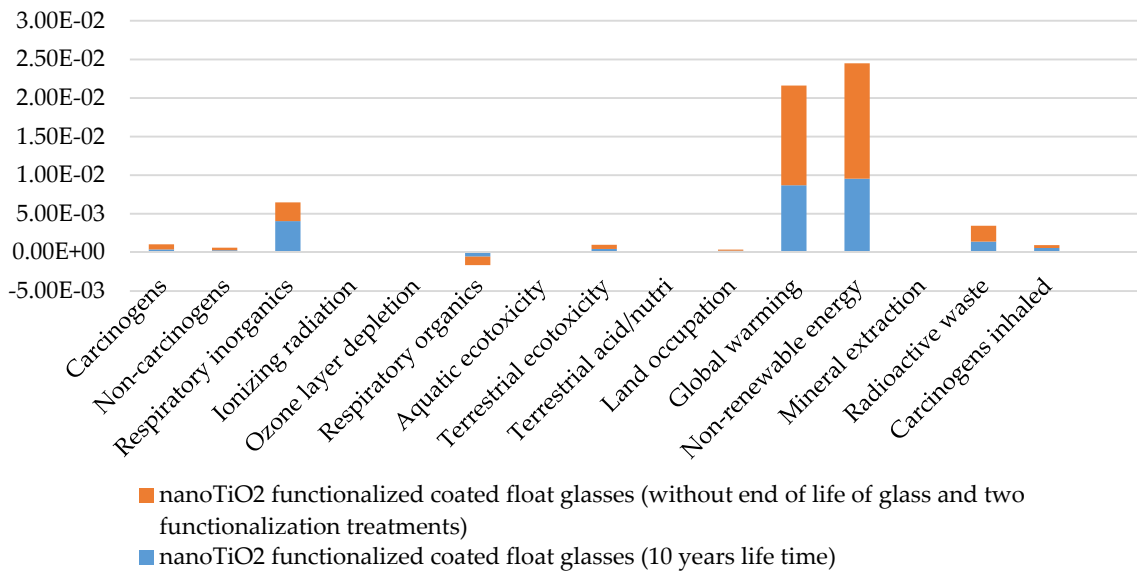

**Figure S3.** Evaluation by impact categories of 1 m<sup>2</sup> of nanoTiO<sub>2</sub> self-cleaning coated float glass (30 years life time) re-functionalized twice.

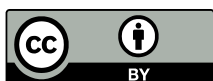

Supplement: s1 [file s1]
